# Supplementary material
Source: MDPI journal article supplement (https://www.mdpi.com/2076-3263/12/1/31)
Supplement: s1 [file s1]

# Supplementary Materials: Effects of Artificial Sweat Formulation and Extraction Temperature on Estimation of the Dermal Bioaccessibility of Potentially Toxic Elements in a Contaminated Soil from an e-Waste Recycling Site

Oluwaseun H. Anselm <sup>1,2,3</sup>, Christine M. Davidson <sup>2,\*</sup>, Aderonke O. Oyeyiola <sup>1</sup> and Temilola O. Oluseyi <sup>1</sup>

**Table S1.** Analyte recoveries (%) from spiked sweat solutions without geological material (mean  $\pm$  SD, n=3).

|          |          | As         | Cd         | Cr         | Cu         | Fe         | Mn         | Ni         | Pb         | Zn         |
|----------|----------|------------|------------|------------|------------|------------|------------|------------|------------|------------|
| At 17 OC | DIW      | 92.7 ± 1.3 | 94.0 ± 0.7 | 89.6 ± 0.4 | 103 ± 2    | 92.6 ± 0.4 | 96.0 ± 1.4 | 88.6 ± 0.3 | 95.5 ± 1.6 | 81.4 ± 1.6 |
|          | BSI      | 92.9 ± 1.0 | 90.0 ± 1.8 | 87.5 ± 0.3 | 86.4 ± 2.8 | 88.6 ± 1.3 | 91.4 ± 2.4 | 84.8 ± 1.3 | 91.6 ± 1.2 | 94.4 ± 1.7 |
|          | NIH      | 87.8 ± 0.2 | 85.6 ± 0.2 | 84.1 ± 0.3 | 93.9 ± 0.5 | 84.7 ± 0.5 | 88.5 ± 0.4 | 78.7 ± 0.4 | 94.8 ± 0.4 | 78.6 ± 1.4 |
|          | S        | 92.3 ± 0.7 | 88.3 ± 0.9 | 85.2 ± 1.3 | 82.5 ± 0.2 | 86.3 ± 0.4 | 89.8 ± 0.5 | 82.6 ± 0.4 | 91.3 ± 0.5 | 83.4 ± 1.6 |
|          | ARI      | 94.0 ± 2.0 | 90.1 ± 1.5 | 86.8 ± 1.3 | 84.3 ± 0.5 | 87.9 ± 0.8 | 91.8 ± 0.9 | 83.8 ± 1.2 | 93.5 ± 1.7 | 85.0 ± 1.5 |
|          | CHE      | 94.5 ± 1.5 | 89.9 ± 1.3 | 87.5 ± 1.5 | 88.4 ± 0.6 | 88.1 ± 1.7 | 91.7 ± 2.4 | 84.7 ± 2.2 | 104 ± 2    | 80.0 ± 1.2 |
|          | At 27 OC | DIW        | 87.0 ± 1.5 | 86.2 ± 1.4 | 82.7 ± 1.4 | 88.1 ± 1.8 | 87.9 ± 1.9 | 88.4 ± 3.1 | 82.3 ± 1.4 | 99.4 ± 3.1 |
| BSI      |          | 90.2 ± 2.3 | 87.1 ± 3.5 | 83.7 ± 1.4 | 88.7 ± 2.6 | 91.0 ± 1.7 | 89.2 ± 2.3 | 81.2 ± 1.6 | 99.6 ± 3.2 | 95.0 ± 3.0 |
| NIH      |          | 91.7 ± 1.8 | 81.9 ± 3.7 | 79.7 ± 3.0 | 86.5 ± 1.3 | 87.2 ± 1.8 | 85.9 ± 1.6 | 74.4 ± 1.7 | 97.4 ± 1.5 | 81.3 ± 2.1 |
| ALT      |          | 88.9 ± 2.1 | 84.0 ± 1.3 | 82.5 ± 4.6 | 86.6 ± 1.8 | 91.7 ± 1.9 | 87.5 ± 1.7 | 78.3 ± 2.1 | 97.8 ± 1.9 | 77.0 ± 1.1 |
| ARI      |          | 103 ± 2    | 99.7 ± 2.1 | 96.1 ± 1.7 | 96.0 ± 2.3 | 92.7 ± 1.5 | 101 ± 1    | 92.8 ± 2.0 | 113 ± 3    | 96.2 ± 2.1 |
| CHE      |          | 88.4 ± 1.3 | 83.6 ± 1.6 | 81.4 ± 1.3 | 81.1 ± 1.9 | 88.6 ± 1.7 | 86.0 ± 1.6 | 77.3 ± 1.9 | 93.6 ± 1.9 | 90.1 ± 1.2 |
| At 32 OC |          | DIW        | 93.8 ± 1.4 | 92.2 ± 1.4 | 90.0 ± 1.3 | 90.1 ± 1.4 | 94.5 ± 1.7 | 96.9 ± 1.4 | 84.1 ± 1.2 | 90.7 ± 0.9 |
|          | BSI      | 94.1 ± 0.9 | 90.5 ± 0.7 | 87.8 ± 0.8 | 84.8 ± 2.3 | 91.1 ± 1.1 | 94.0 ± 0.3 | 81.2 ± 0.7 | 90.9 ± 1.1 | 83.5 ± 1.1 |
|          | NIH      | 96.1 ± 1.3 | 85.8 ± 1.0 | 84.9 ± 0.9 | 98.5 ± 1.2 | 87.8 ± 1.3 | 91.7 ± 0.8 | 70.0 ± 1.5 | 94.0 ± 0.8 | 82.4 ± 0.7 |
|          | ALT      | 93.9 ± 1.0 | 89.3 ± 0.9 | 87.6 ± 0.7 | 97.2 ± 2.3 | 91.2 ± 0.8 | 94.5 ± 0.3 | 70.8 ± 0.4 | 93.1 ± 0.8 | 110 ± 1    |
|          | ARI      | 91.8 ± 1.3 | 87.5 ± 0.5 | 86.0 ± 0.5 | 90.2 ± 1.7 | 90.1 ± 0.7 | 92.3 ± 1.2 | 83.6 ± 1.9 | 91.0 ± 0.6 | 109 ± 2    |
|          | CHE      | 94.4 ± 1.0 | 88.7 ± 0.8 | 87.8 ± 0.9 | 87.4 ± 1.8 | 91.8 ± 2.0 | 93.9 ± 0.9 | 82.4 ± 0.9 | 91.9 ± 0.6 | 84.2 ± 0.9 |
